# Supplementary material for: Crude Extracts and Alkaloids Derived from Ipomoea-Periglandula Symbiotic Association Cause Mortality of Asian Citrus Psyllid Diaphorina citri Kuwayama (Hemiptera: Psyllidae)
Source: MDPI journal article supplement (doi:10.3390/insects12100929), 2021-10-12
Supplement: s1 [file s1]

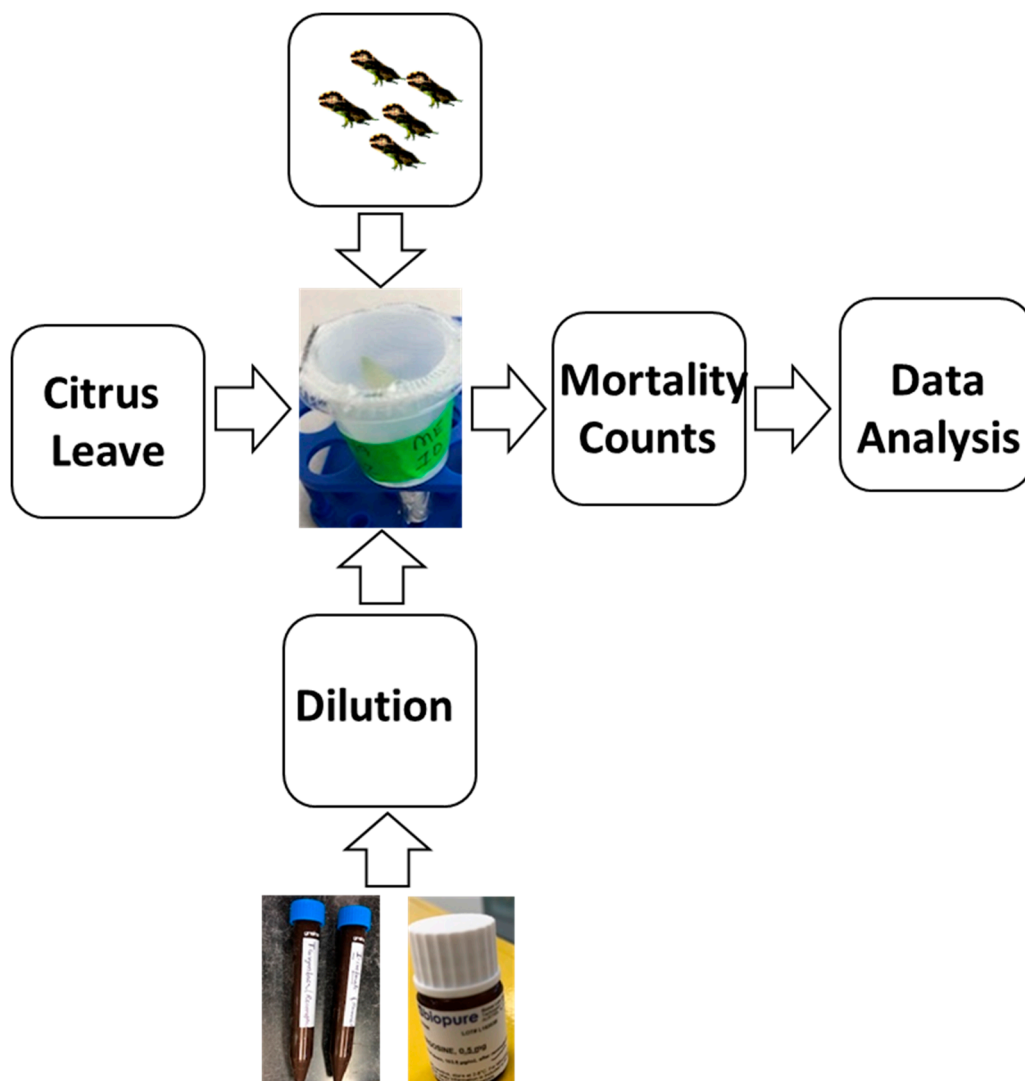

**Supplementary Figure S1** . Crude extracts and alkaloid of toxicity of bioassay procedure on Asian citrus psyllid, *Diaphorina citri*.
